# Supplementary material for: Photoswitchable anion recognition via synergy between chalcogen bonding and hydrogen bonding
Source: Royal Society of Chemistry journal article supplement (doi:10.1039/d5qo01341k), 2025-10-08
Supplement: d5qo01341k4.pdf [file d5qo01341k4.pdf]

## XRD evidence for the binding of water

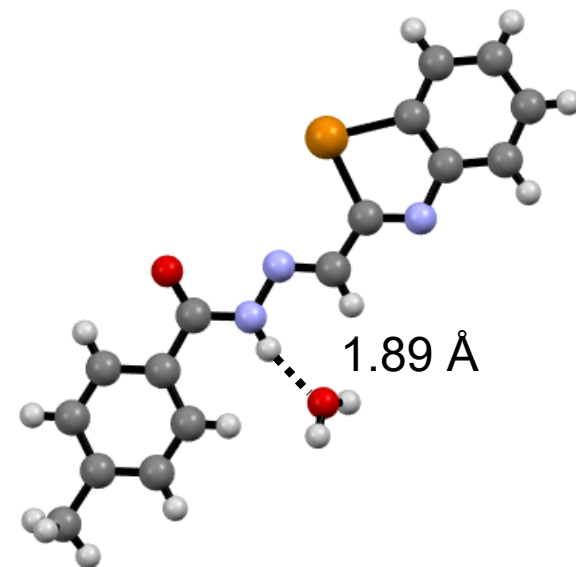

DMSO readily absorbs moisture from the atmosphere. The hydrazone compounds can bind water, as confirmed by the crystal structure analysis of *E-7*.
